# Supplementary material for: Optical signatures of hydration-controlled hysteretic spin-crossover in single crystals of an Fe( ii ) complex
Source: Royal Society of Chemistry journal article supplement (doi:10.1039/d5dt02247a), 2025-12-05
Supplement: d5dt02247a1.pdf [file d5dt02247a1.pdf]

# Optical Signatures of Hydration-Controlled Hysteretic Spin-crossover in Single Crystals of an Fe(II) Complex

Chinmoy Das<sup>1</sup>, Malcolm A. Halcrow<sup>2</sup>, Denisa Coltuneac<sup>3</sup>, Laurentiu Stoleriu<sup>3</sup>, Pradip  
Chakraborty<sup>1\*</sup>

<sup>1</sup>Department of Chemistry, Indian Institute of Technology Kharagpur, Kharagpur-721302, India

<sup>2</sup>School of Chemistry, University of Leeds, Woodhouse Lane, Leeds, UK LS2 9JT

<sup>3</sup>Faculty of Physics, Al. I. Cuza University, 700506 Iasi, Romania

\*Corresponding Author, E-mail: [pradipc@chem.iitkgp.ac.in](mailto:pradipc@chem.iitkgp.ac.in)

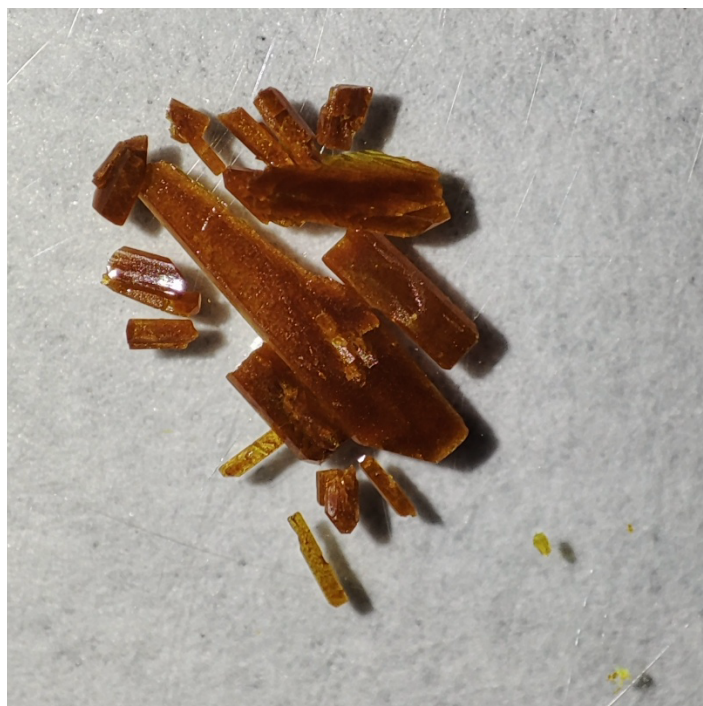

**Figure S1.** Image of single crystals of  $[\text{Fe}(\text{bppsipr})_2](\text{BF}_4)_2 \cdot \text{H}_2\text{O}$  taken at room temperature (HS), showing well-shaped and individually well-formed crystals.

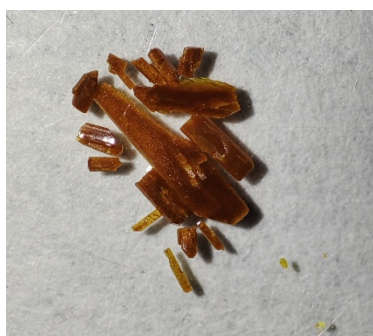

**HS (Room temperature)**

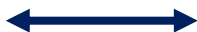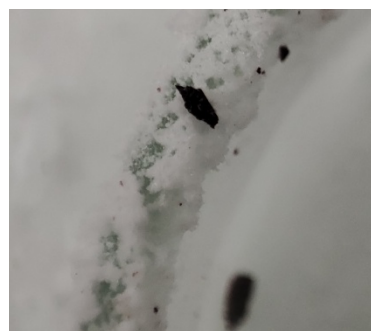

**LS (Low temperature)**

**Figure S2.** Representative images of the single crystal of  $[\text{Fe}(\text{bppsipr})_2(\text{BF}_4)_2] \cdot \text{H}_2\text{O}$  captured in its high-spin (HS) and low-spin (LS) states, illustrating the visual changes associated with the spin-state switching
